# Supplementary material for: Recombinant Pseudorabies Virus with TK/gE Gene Deletion and Flt3L Co-Expression Enhances the Innate and Adaptive Immune Response via Activating Dendritic Cells
Source: MDPI journal article supplement (doi:10.3390/v13040691), 2021-04-16
Supplement: s1 [file s1]

## Supplementary Materials

Table S1. Oligonucleotide primers used in this study

| Primers              | Sequences                                                        | Application                      |
|----------------------|------------------------------------------------------------------|----------------------------------|
| sgRNA-TK-F           | caccggtctgcgcatcgtaaatac                                         | TK sgRNA cloning                 |
| sgRNA-TK-R           | aaacgtatttacgatgcgcagacc                                         |                                  |
| sgRNA-gE-F           | caccgccgtgttctttgtggcggt                                         | gE sgRNA cloning                 |
| sgRNA-gE-R           | aaacaccgccataaagaacacggc                                         |                                  |
| TKhm1-F              | ccgccttatcatccccgctccccgccg                                      | TKhm1 amplification              |
| TKhm1-R              | ggcgccgtcgaggtagatccggagg                                        |                                  |
| LoxP-TKhm2-F         | ataacttcgtatagcatacattatacgaagtatgt<br>tgtgaccctcggccctcccaccgcg | TKhm2 amplification              |
| TKhm2-R              | ctccgcgtccgcgaggacggccac                                         |                                  |
| LoxP-CMV-F           | ataacttcgtatagcatacattatacgaagtatgt<br>gatgcgggttttggcagtac      | CMV enhancer amplification       |
| CMV-R                | agctctgcttatatagacc                                              |                                  |
| Flt3L-F              | atggtagtgcggcgcca                                                | Flt3L amplification              |
| Flt3L-R              | tcatgtgaatgctggggacac                                            |                                  |
| mCherry-F            | atggtgagcaaggcgaggagga                                           | mCherry amplification            |
| mCherry-R            | gggcccgggatccaccgatctaga                                         |                                  |
| gEhm1-F              | gaacgggaccacggacctct                                             | gEhm1 amplification              |
| gEhm1-R              | atctgcgcggcgcgacagagaaagg                                        |                                  |
| loxN-eGFP-F          | ataacttcgtatagtataccttatacgaagtatgtg<br>agcaagggcgagg            | eGFP amplification               |
| eGFP- loxN-R         | ataacttcgtataaggtatactatacgaagtatctt<br>gtacagctcgtccat          |                                  |
| gEhm2-F              | aaccgcctgttgatgtcc                                               | gEhm2 amplification              |
| gEhm2-R              | acgcgtcgcgacaact                                                 |                                  |
| gE300-F              | cgggatctggacgttctg                                               | gE gene verification             |
| gE500-R              | atggggcggctcgcgccggag                                            |                                  |
| TK114-F              | cgcactctgttcgacacgga                                             | TK gene verification             |
| TK367-R              | gctgatgtccccgacgatga                                             |                                  |
| Flt3L 51-F           | ctgctgctgctgctgctgag                                             | Flt3L gene verification          |
| Flt3L 392-R          | gagatgttggcctggacgaagc                                           |                                  |
| <u>eGFP-378-F</u>    | <u>ggcatcgactcaaggagg</u>                                        | <u>eGFP gene verification</u>    |
| <u>eGFP-665-R</u>    | <u>tgatccccggcgccggtcacgaac</u>                                  |                                  |
| <u>mCherry-32-F</u>  | <u>catcatcaaggagttcatgc</u>                                      | <u>mCherry gene verification</u> |
| <u>mCherry-593-R</u> | <u>ccaactgatgttgacgttg</u>                                       |                                  |

Fig. S1 Sequence of PRV gE gene recombination donor template (gEhm1-loxN-eGFP-loxN-gEhm2) gE hm1 and gE hm2 colored in green, loxP sites colored in grey, eGFP colored in blue, the endogenous TSS of PRV gE shaded in violet.

```

gaacgggaccacggacctctttgtgctgacggccctggtgccgagggggcgccccgtccccacgtcgccgcccgc
ggacgagtgccggcccgctcgatcggtggcacgacagcctgcgcgtcgtggaccccgccgaggacgccgtgttac
caccagcccccgccgagcccgagccgacgacccccgcgcccccgggggaccggcgccacccccgagcc
ccgatcggacgaggaggaggagggtgacgcggagacgacgacgccgacgtgaccccgcgccggggaccctgga
cggaacggcacgatggtgctgaacgccagcgtcgtgctgcgcgtctctgctcgccgcccaacgccacggcgggcg
ccggagccccgggaagatagccatggtgctggggccacgacgctcgtctctctgatcttctgggcgggatcgctgc
gtggcccgcgctgcgcgcggaatcgcatctaccggccgcgacccggcgcgatcgccggtccatcgggcgcccc
gcggcgccccgcccccaaccccgctcgccggggcgcccgctccccagcccaagatgacgttgccgagctgcgccaga
agctcgccaccatcgagaagaacaataaaaagggtggtgtttgcataatfttgggtggcggtttatctccgctccgcgcgtt
ttaacctgggcacccccgcgagctcgcacacaccggggttgagaccatgcggccctttctgctgcgcgcccgcgagat
ataacttcgtatagtatataccttatacgaagttatgtgagcaagggcgaggagctgttcaccgggggtggtgccccatcctggtcg
agctggacggcgacgtaaacggccacaagtgcagctgtccggcgagggcgagggcgatgccacctacggcaagctg
acctgaagttcatctgaccaccggcaagctgcccgtgccctggccccaccctcgtgaccaccttcggtacggcctgca
gtgcttcgcccgtaccccgaccacatgaagcagcagacttctcaagtccgcatgcccgaaggctacgtccaggagc
gcacctcttctcaaggacgacggcaactacaagaccgcgcccaggtgaagttcgagggcgacacctggtgaaccg
catcgagctgaagggcatcgacttcaaggaggacggcaacatcctggggcacaagctggagtacaactacaacagcca
caacgtctatatcatggccgacaagcagaagaacggcatcaaggtgaactcaagatccgccacaacatcgaggacggc
agcgtgcagctcgccgaccactaccagcagaacacccccatggcgacggccccgtgctgctgcccgacaaccactac
ctgagctaccagtcggccctgagcaaagaccccaacgagaagcgcgatcacatggtcctgctggagttcgtgaccgccg
ccgggatcactctcgcatggacgagctgtacaagataacttcgtatagtatataccttatacgaagtataaccgcctgttgatg
tcccfgcccgcttaataaccgggagaaccggctcgcccgcatcgcacatgcccggcgccgctccgctcgacatggac
acgtttgaccccgagcccccgctccgacgagcgtctcgaacccggcgccgacgtcctgctgcccccaagggaccc
cgctccccgctgcgccccagggacgactcgactgctactacagcgagagcgacaacgagacgcccagcgagtctctg
cgccgcgtgggacgcccggcaggcggcgcgtcggagacgcccgcctgatggcgctcgcatcagcgccgccc
cgctggtcatctgctcgctgtccgcgtactcgggggcatcgtcgccaggcacgtgtagcgagcgagcgagcgaacggg
agcggggggccccccccatccgcccgcggcaggagaggggggagagagcgggggggtgggcgcgccacgtggtgt
gggcacggactcggaactgtcacaataatgggccccggcggtgtccggcgacacagcagccttctctcccgctc
tctgtccgcccgtctcgcggactcttcttccaccgctccaccgtcgagttgtcgcgagcgcgt

```

Fig. S2 Sequence of PRV TK gene recombination donor template (TKhm1-Flt3L-loxP-CMV promoter-mCherry-loxP-TKhm2) TKhm1 and TKhm2 colored in green, Flt3L colored in yellow, loxN sites colored in grey, CMV enhancer colored in blue, and mCherry colored in red.

ccgccttatcatccccgctccccgccgcccggccccggccccgcgcgcgcgcgcgatcgcgatcaccgccgcggcc  
cggcgacgtactcggcgaggccgcgcacggtcgcggccatcgcgtcgcgttgcgcgcgcgtctgggtgcagggcagg  
cgcgtcacgtcgagcacgcgcgatctccgctggggccacaaacaccagcaggggcacgagcgtgatctcctcgccccc  
ggggggcacggcggcggcgaggaggcgcgcgagtcgcgcagctggcacagccccctgtgccgtgcccgcgcttgc  
tgggcgtgtttaggttccgggggaagcggcacgtctttagctcgataggaagcacaggctgcgggccccgccccagcc  
gcaccacgcacacgcagtcggggcgggcgacccccgaggttgaacttcaaaaggccagggtcaaggacgccttcttaagcg  
tctctgggggaagccccgaagagactctcgccgtacgcggacgggtcgcgtcgcagggcttcgtlagaagcggttgtggca  
gcggatccccgccccgaagcgcgcggggatgcgcatcctccggatctacctcgacggcgccatggtagtgcgggcgc  
agcctggagcccaactacctgcgtgctgctgctgctgctgctgctgctgctgctgagccccggccttctcgggagccccggactg  
ctcttccccacagccccatctctccaccttcgccaacaccatccgccagctgtctgactactgtctcaggattaccagt  
cactgtcgctccaacctgcaggacgacgagctctgcggggcgftctggcgctgtgtcttgcccagcggttgatgggac  
agctcaagaccgtggctgggtcccagatgcagaagctgtcggaggctgtcaacaccgagatagtctttgtcacctcatgtg  
ccctccagccccctcccagctgtcttctccttcgccaaggccaacatctcccacctctgcaggacactcccagcagctggt  
ggccttgaagccctggatcacccgccggaatttctccggttgcctggagctgcagtgtcagccggaccctccacctgtct  
gccccaaaggagtctcctggggccttggaggccacatcctgcgggcacctcaggcctctcttctgtcctcttgcctgctg  
ctgctgcctgccgcctctctgctgctggccactgcctgggtgcctgcgcggaggaggaggagacggaggatgccttgc  
ccgggggagcgggtgtccccagatcacaatgaataacttcgtatagcatacattatacgaagtattgtatgcggttttggca  
gtacatcaatgggcgtggatagcgggttgaactcacggggatttcaagctccacccattgacgtcaatgggagttgttttg  
gcacaaaaatcaacgggactttcaaaatgtcgttaacaactccgccccattgacgcaaatgggcggtaggcgtgtacggt  
gggagggtctatataagcagagctatggtgagcaaggggcgaggaggataacatggccatcatcaaggagttcatgccttc  
aagggtgcacatggagggtcctgtgaacggccacgagttcgagatcgaggggcgaggggcgaggggcccccctacgagg  
gcacccagaccgccaagctgaagggtgaccaagggtggccccctgccttcgcctgggacatcctgtccctcagttcatg  
tacgggtccaaggcctacgtgaagcaccgccgcacatccccgactacttgaagctgtccttccccgagggcttcaagtgg  
gagcgcgatgaacttcgaggacggcgggcggtgtgacggtgaccaggactcctcctgcaggacggcgagttcatct  
acaagggtgaagctgcgcggcaccaacttccccctccgacggccccgtaatgcagaagaaaaccatgggctgggaggcct  
ctccgagcgggatgtaccccgaggacggcgccccgaaggcgagatcaagcagagggtgaagctgaaggacggcgg  
ccactacgacgctgaggtcaagaccacctacaaggccaagaagcccgtcagctgccccggcgccctacaacgtcaacatc  
aagttggacatcacctcccacaacgaggactacaccatcgtggaacagtacgaacgcgcggaggggccgcccactccacc  
ggcggcatggacgagctgtacaagtccggactcagatctcgagctcaagcttcgaattctcgatcgacgggtaccgcggg  
cccggtatccaccggatctagataaacttcgtatagcatacattatacgaagtattggtgtgaccttcgccccctccacccgc  
gccacggccggatggagaccgcgacggaggcaacgacgacggcggtgggagggggctcggggcgcggtataaagcca  
tgtgtatgtcatccaataaagtfttgcctgcccgtcaccatgcccgcgtcgtcctgctgcgcctcccgtcgcctcctgacce  
tcgggggctccttgccctcgcggggggccgcccctcgcggcgggcgcgccgcaggggtgggcccctcgcgcga  
gggggggtcccgcgccaccgcggcgcccgcgcggggcccacctgttctgcttgacggcgacgggtccgcgtggt  
tcgtcttcagctcggcgggtggggggcgctcaacgacacgcgcacatccgcgggcacctgctcggccggtacctcgtctc  
gtaccaggtggtgccccgcctctccgcgttggtactttgtgcagcggcgcgagcggccgcctctcggggccg  
ccctcggggcgggagctcgtggccttcgacgcgcccggcgctccggcgacgtacaccacggcgggcggtgtggccccg  
ggaggtggcgctcctcgcggacgcggag
